# Supplementary material for: Hydrogenstorage in water-stable metal–organic frameworks incorporating 1,3- and 1,4-benzenedipyrazolate
Source: Royal Society of Chemistry journal article supplement (doi:10.1039/b917512a), 2009-11-05
Supplement: b917512a.pdf [file b917512a.pdf]

Supporting Information for:

**Hydrogen Storage in Water-Stable Metal-Organic Frameworks  
Incorporating 1,3- and 1,4-Benzenedipyrazolate**

Hye Jin Choi, Mircea Dinca, Anne Dailly, and Jeffrey R. Long\*

*Department of Chemistry, University of California, Berkeley, California 94720 and Chemical  
and Environmental Sciences Laboratory, General Motors Corporation, Warren, Michigan 48090*

\*e-mail: [jrlong@berkeley.edu](mailto:jrlong@berkeley.edu)

*Energy & Environmental Science*

**Table S1.** Crystallographic Data for Co(1,3-BDP)·DEF·0.5H<sub>2</sub>O.

| Identification                                                                               | Co(BDP)·DEF·0.5H <sub>2</sub> O                                   |
|----------------------------------------------------------------------------------------------|-------------------------------------------------------------------|
| Formula                                                                                      | CoC <sub>17</sub> H <sub>20</sub> N <sub>5</sub> O <sub>1.5</sub> |
| FW                                                                                           | 377.31                                                            |
| <i>T</i> , K                                                                                 | 150(2)                                                            |
| Wavelength, Å                                                                                | 0.77490                                                           |
| Crystal system, space group                                                                  | Tetragonal, I4(1)/amd                                             |
| <i>Z</i>                                                                                     | 16                                                                |
| <i>a</i> , Å                                                                                 | 22.847(15)                                                        |
| <i>c</i> , Å                                                                                 | 12.458(16)                                                        |
| <i>V</i> , Å <sup>3</sup>                                                                    | 6503(10)                                                          |
| <i>d</i> <sub>calc</sub> , g/cm <sup>3</sup>                                                 | 1.542                                                             |
| Adsorption coefficient, mm <sup>-1</sup>                                                     | 1.074                                                             |
| <i>F</i> (000)                                                                               | 2674                                                              |
| Crystal size, mm <sup>3</sup>                                                                | 0.015 × 0.015 × 0.04                                              |
| Theta range for data collection                                                              | 2.75-19.14°                                                       |
| Index range                                                                                  | -19 ≤ <i>h</i> ≤ 19, -19 ≤ <i>k</i> ≤ 19, -10 ≤ <i>l</i> ≤ 10     |
| Reflections collected                                                                        | 10681                                                             |
| Independent reflections                                                                      | 559 [ <i>R</i> (int) = 0.1042]                                    |
| Data/restraints/parameters                                                                   | 559 / 6 / 81                                                      |
| GOF on <i>F</i> <sup>2</sup>                                                                 | 1.341                                                             |
| Largest diff. peak and hole, e·Å <sup>-3</sup>                                               | 0.346 and -0.271                                                  |
| <i>R</i> <sub>1</sub> ( <i>wR</i> <sub>2</sub> ) <sup>a</sup> , [ <i>I</i> > 2σ( <i>I</i> )] | 0.0635 (0.1642)                                                   |
| <i>R</i> <sub>1</sub> ( <i>wR</i> <sub>2</sub> ) <sup>a</sup> , all data                     | 0.0794 (0.1748)                                                   |

$$^a R_1 = \sum ||F_o| - F_c| / \sum |F_o|, wR_2 = \{ \sum [w(F_o^2 - F_c^2)^2] / \sum [w(F_o^2)^2] \}^{1/2}.$$

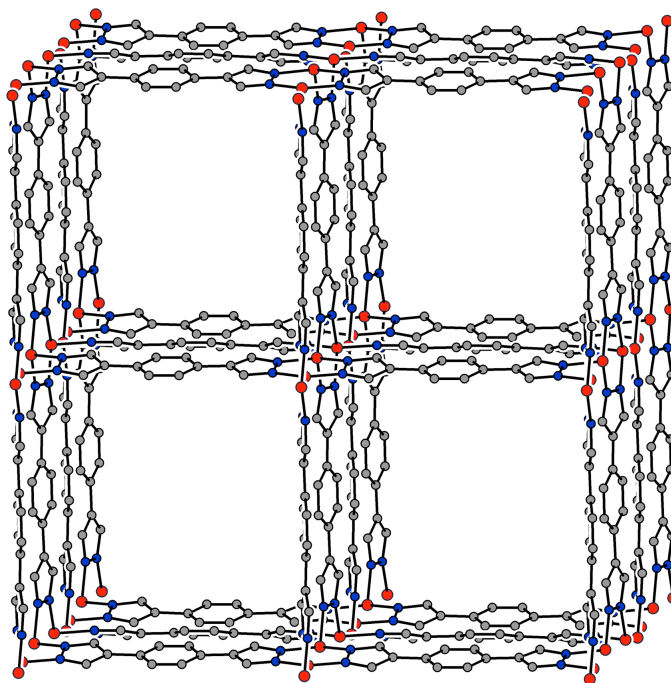

**Fig. S1** A portion of the crystal structure of **1**, which is isostructural to Co(1,4-BDP).<sup>1</sup>  
Red, blue, and grey spheres represent Zn, N, and C atoms, respectively.

---

<sup>1</sup>H. J. Choi, M. Dinca, J. R. Long, *J. Am. Chem. Soc.* 2008, **130**, 7848.

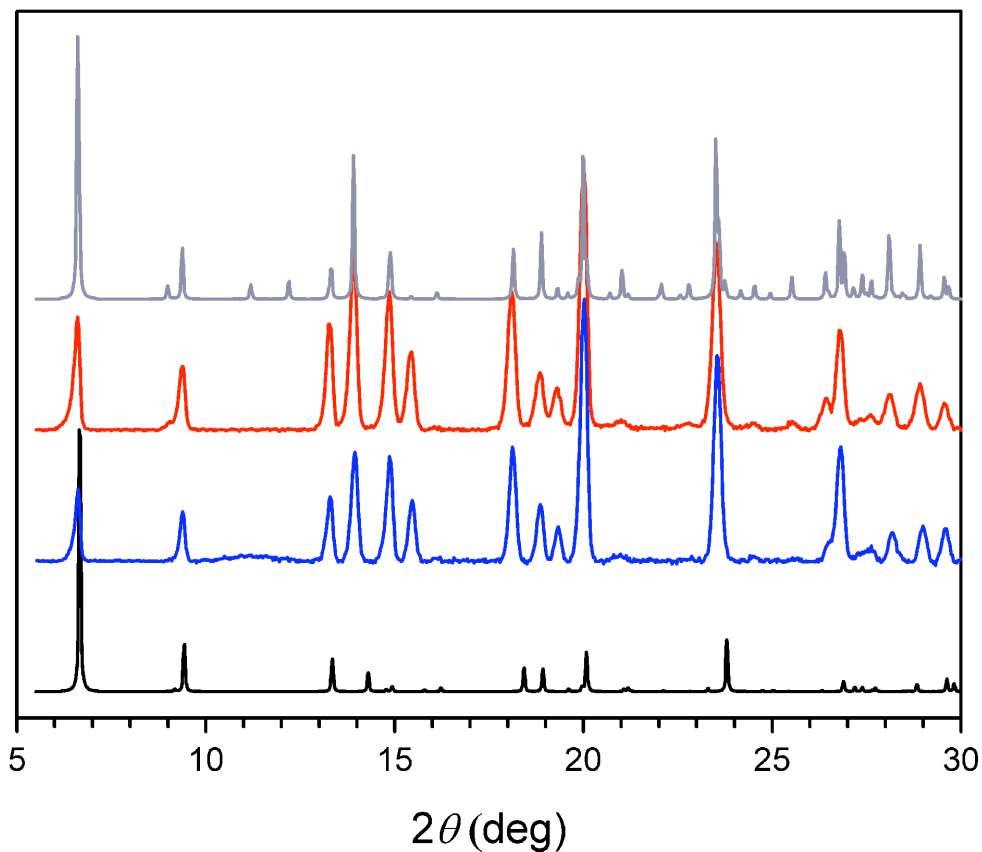

**Fig. S2** Powder X-ray diffraction patterns for the crystallographic simulation for Co(1,4-BDP)·2DEF·H<sub>2</sub>O (black) and its pulverized crystals (blue), and Zn(1,4-BDP)·2DEF·H<sub>2</sub>O (**1**) (red) and its simulation pattern based on the unit cell refinement (grey).

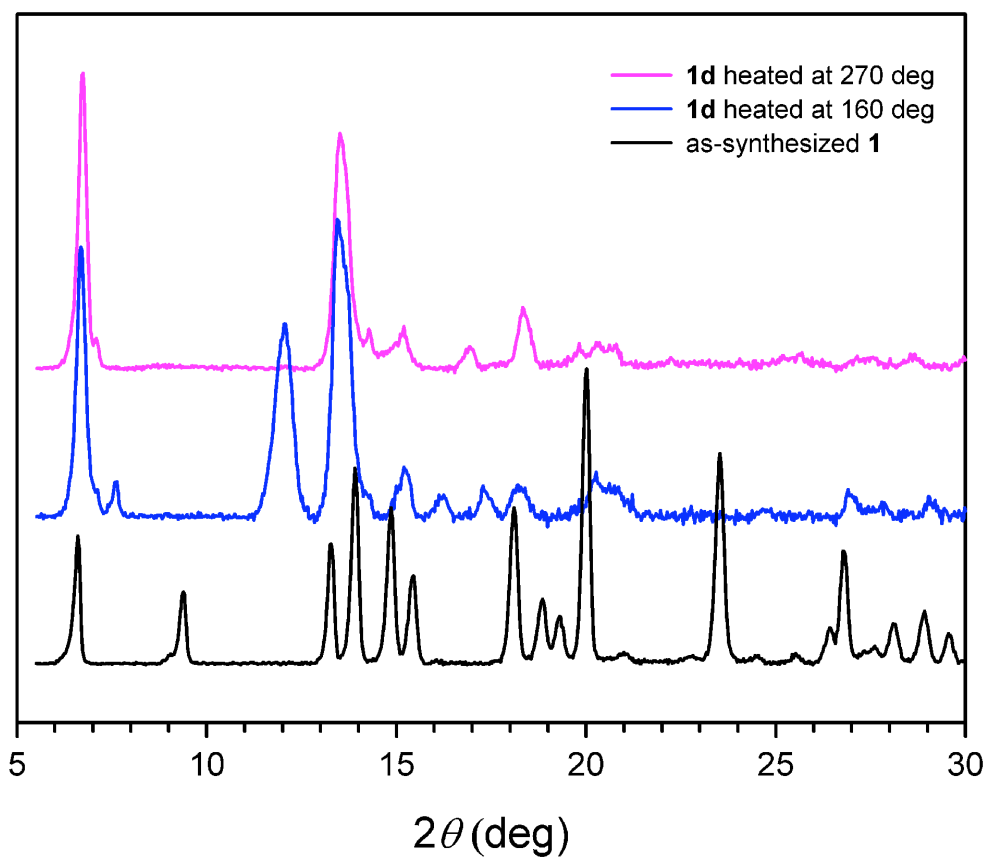

**Fig. S3** Powder X-ray diffraction patterns for the as-synthesized solid **1** (black), and its desolvated form **1d** heated at 160 °C (blue) and 270 °C (pink).

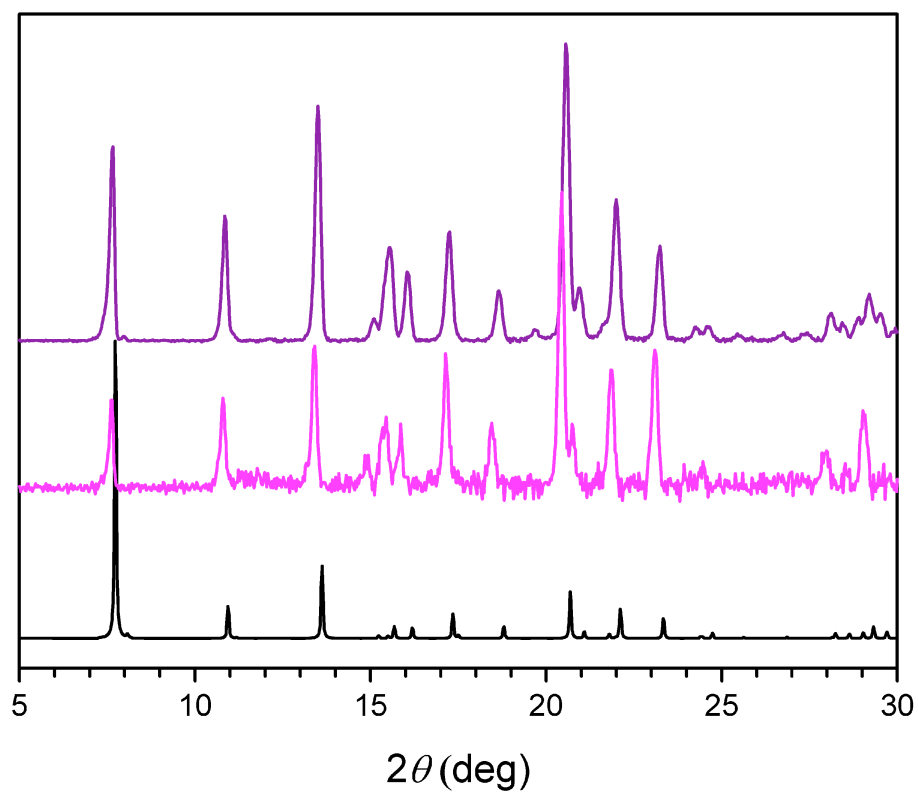

**Fig. S4** Powder X-ray diffraction patterns for the crystallographic simulation for Co(1,3-BDP)·DEF·0.5H<sub>2</sub>O (**2**) (black), pulverized crystals of **2** (pink) and Zn(1,3-BDP)·0.7DMF·0.5H<sub>2</sub>O (**3**) (dark pink).

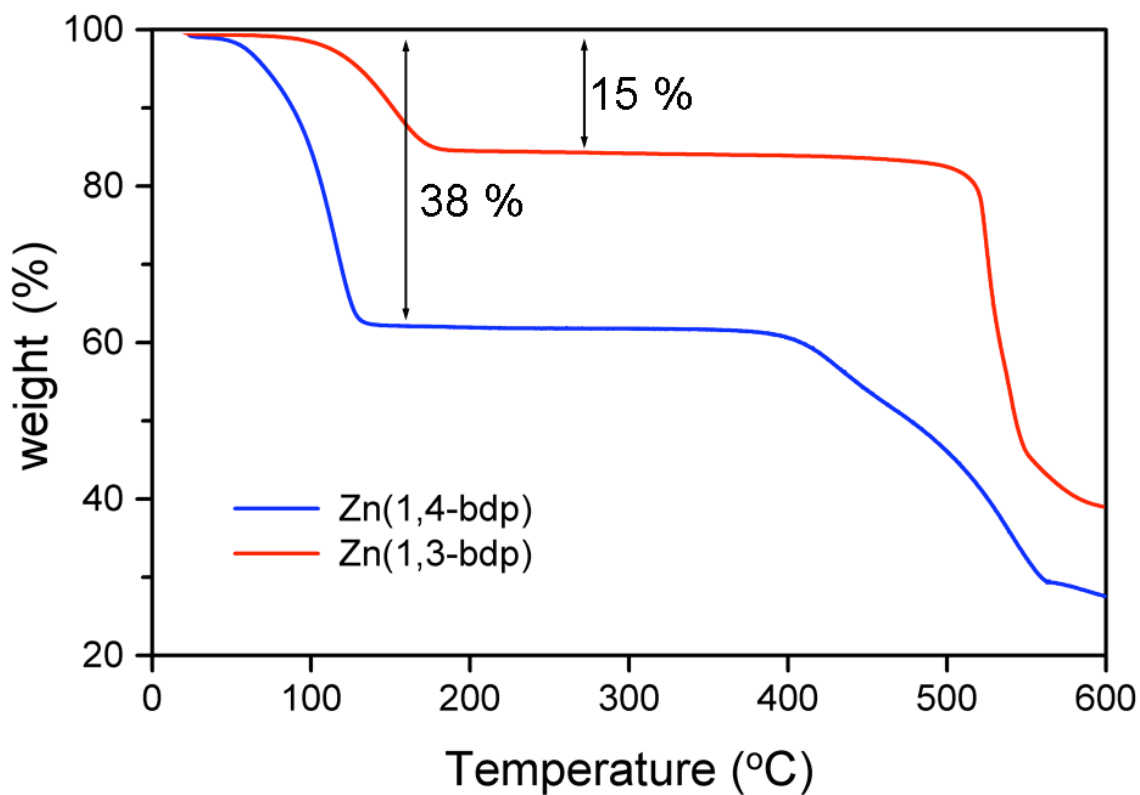

**Fig. S5** Thermogravimetric analysis data for Zn(1,4-BDP)·2DEF·H<sub>2</sub>O (**1**) (blue) and Zn(1,3-BDP)·0.7DMF·0.5H<sub>2</sub>O (**3**) (red) measured using a ramp rate of 1.0 °C/min.

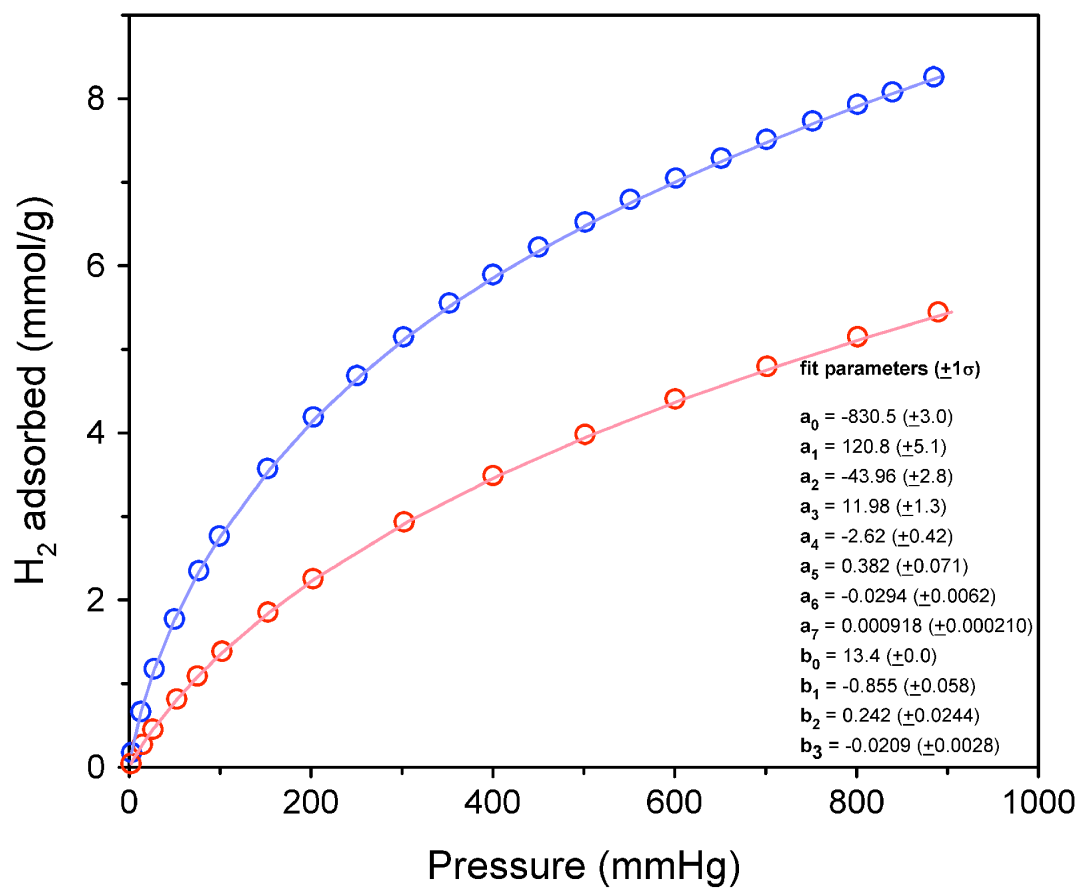

**Fig. S6** H<sub>2</sub> adsorption isotherms for **1d** at 77 K (blue) and 87 K (red), and the respective virial fits (solid lines).

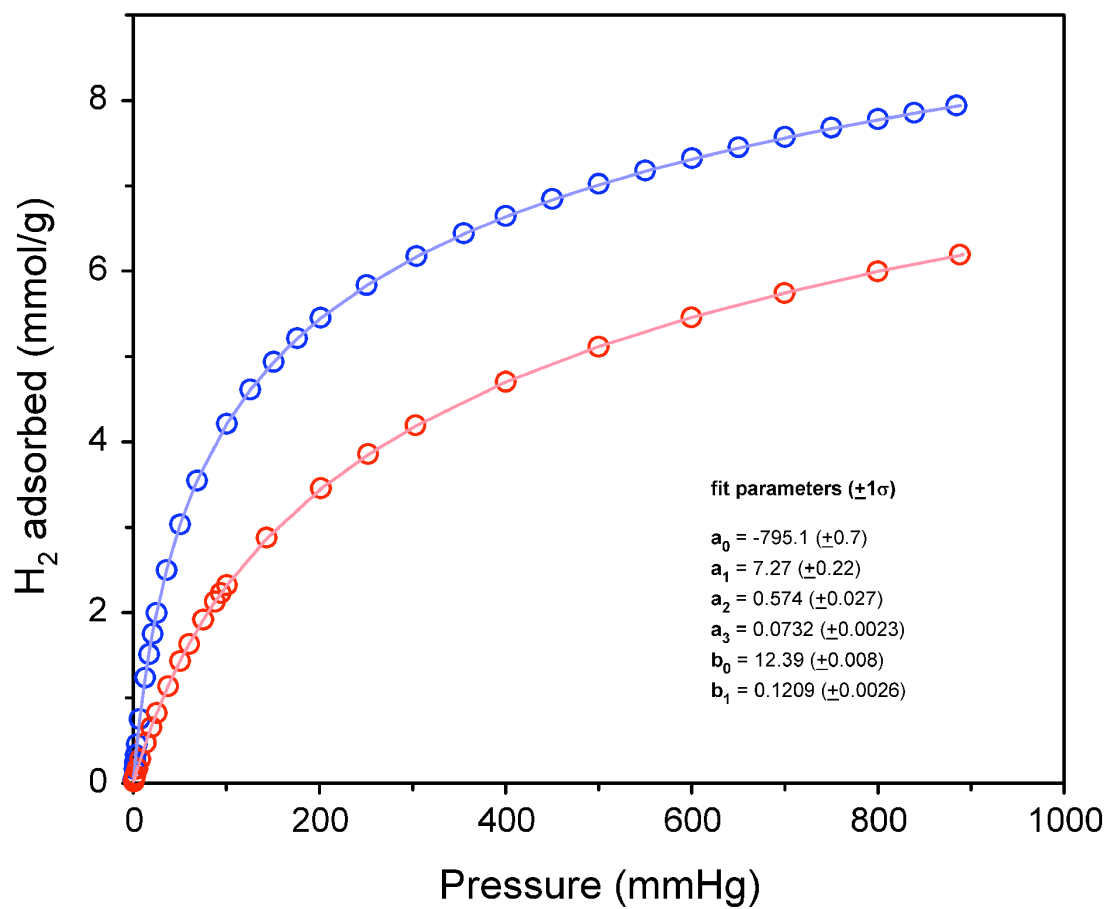

**Fig. S7** H<sub>2</sub> adsorption isotherms for **3d** at 77 K (blue) and 87 K (red), and the respective virial fits (solid lines).

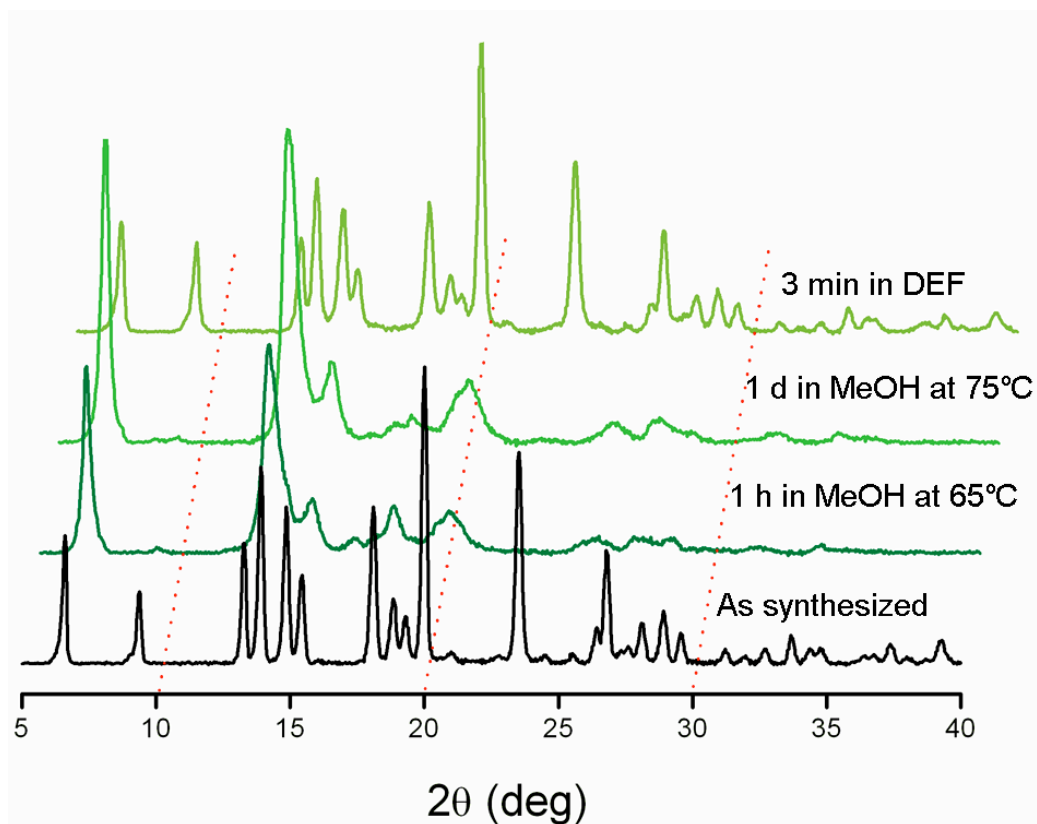

**Fig. S8** Powder X-ray diffraction patterns for **3** treated under various conditions, showing its high thermal stability as well as chemical stability.

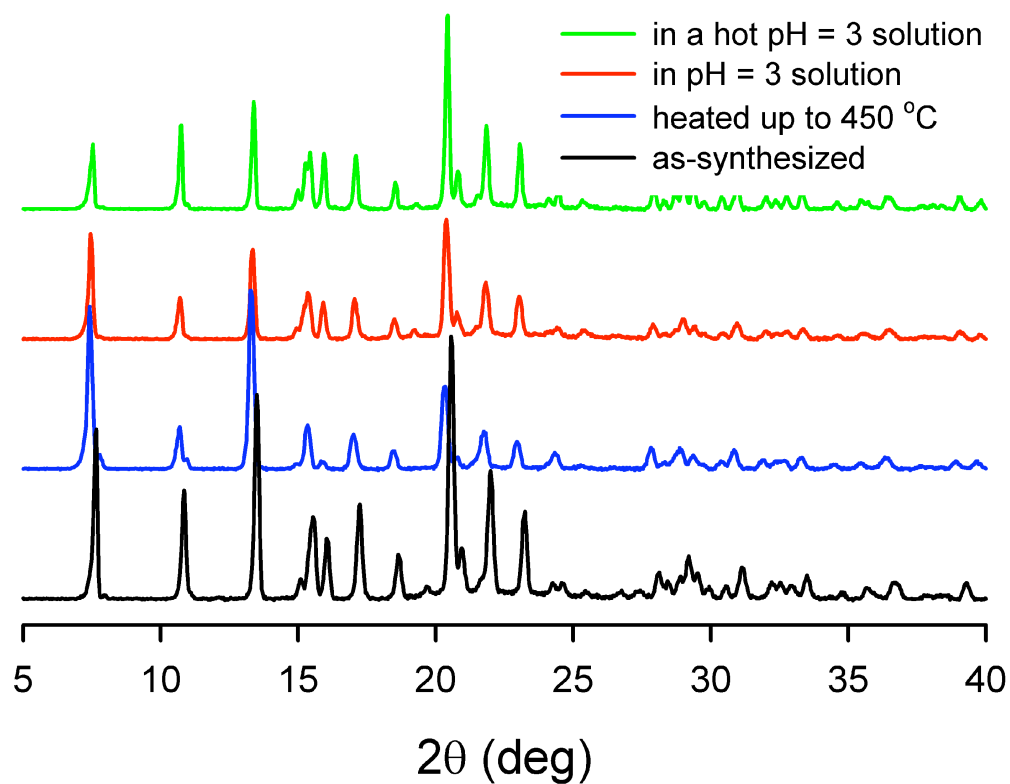

**Fig. S9** Powder X-ray diffraction patterns for **3** treated under various conditions, showing its high thermal stability as well as chemical stability.

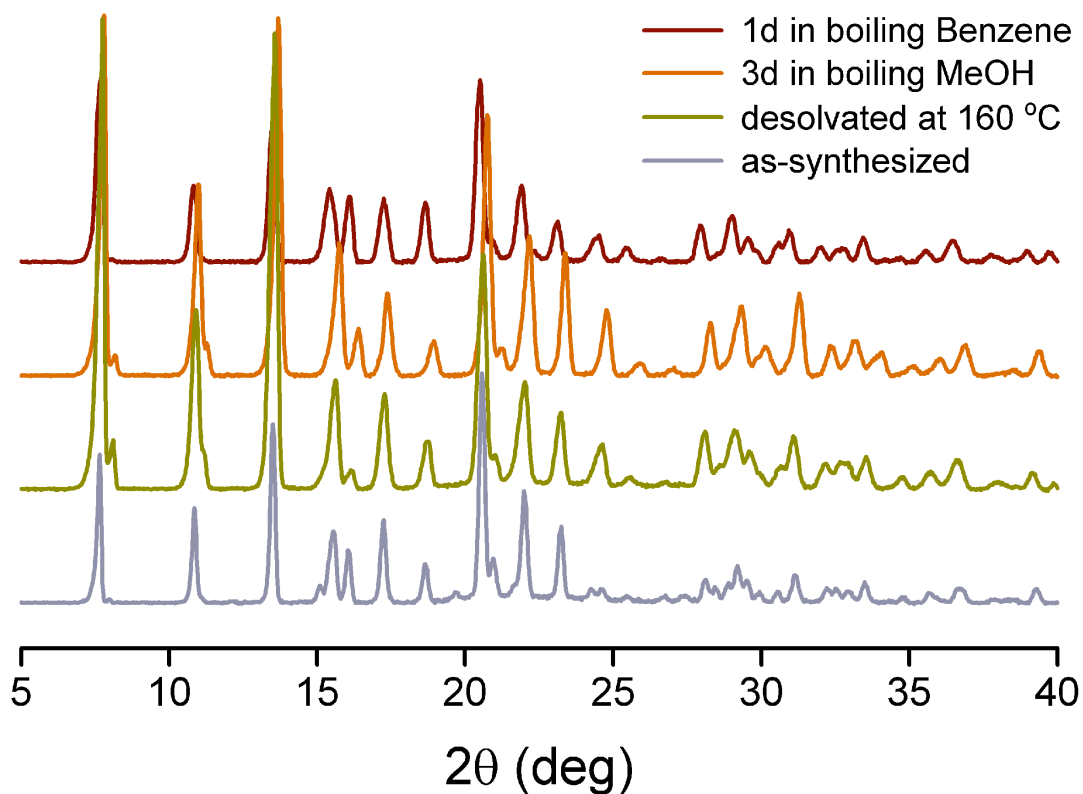

**Fig. S10** Powder X-ray diffraction patterns for **3** treated under various conditions (1d = 1 day, 3d = 3 days), showing its high thermal stability as well as chemical stability.
